# Supplementary material
Source: bioRxiv or medRxiv preprint supplement (https://www.biorxiv.org/highwire/filestream/21482/field_highwire_adjunct_files/11/077701-7.pdf)

# COREAD

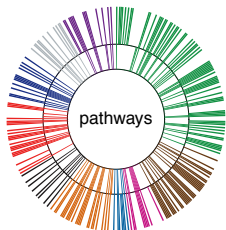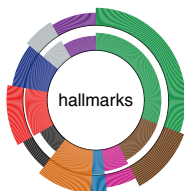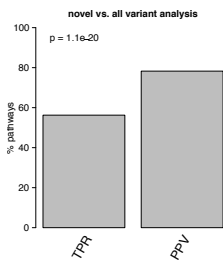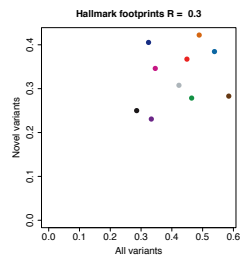

# HNSC

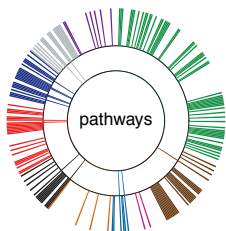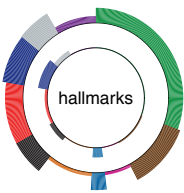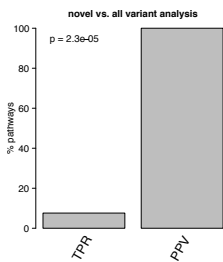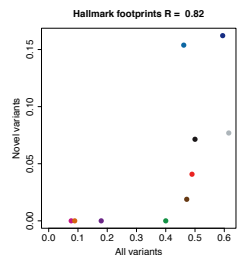

# LUAD

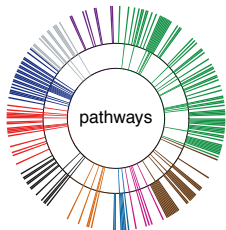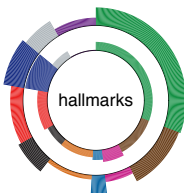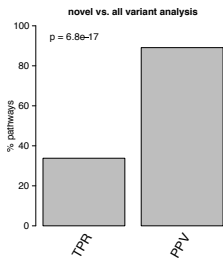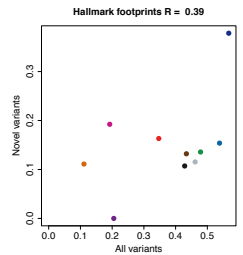

# SKCM

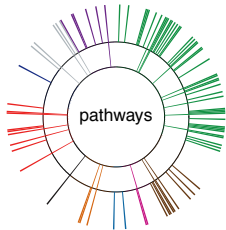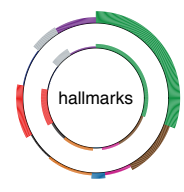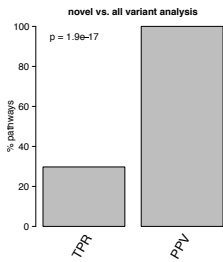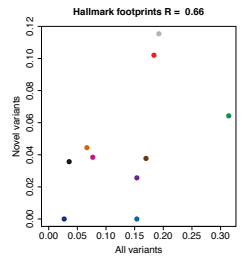

Supplement: Supplementary file [file 077701-7.pdf]
